# Supplementary material for: The Dynamics of the Light Adaptation of the Human Visual System; Subjective and Electroretinographic Analysis
Source: Preprints.org preprint supplement (doi:10.20944/preprints201707.0055.v1), 2017-07-19
Supplement: Supplementary file 1 [file supplementary]

**Author Contributions**

Franz Thoss and Bengt Bartsch conceived and designed the experiments.

Friederike Thoss and Simone Ballosek performed the experiments and analysed the data.

Franz Thoss and Friederike Thoss wrote the paper.
